# Supplementary material
Source: PubMed Central journal article supplement (PMC4625581)
Supplement: NIHMS64810-supplement-2.pdf [file NIHMS64810-supplement-2.pdf]

## Supplemental Tables

**Table S1:** Mean proportions of time spent in different sleep stages out of total time asleep. Sleep efficiency denotes time spent in Stages 1-4 or REM between sleep onset and last wake up.

|                  | <i>mean</i> | <i>s.d.</i> |
|------------------|-------------|-------------|
| Stage1           | 28%         | 21%         |
| Stage2           | 41%         | 15%         |
| Stage3           | 12%         | 9%          |
| Stage4           | 3%          | 4%          |
| REM              | 16%         | 9%          |
| Sleep time       | 8.42h       | 2.00h       |
| Sleep efficiency | 90%         | 10%         |

**Table S2a:** Length of artifact free NREM data segments ('dataminutes'), total number of events and event densities (n events/dataminutes) for SOs, spindles and ripples detected in the hippocampus.

| <i>participant</i> | HC                 |                 |                |                 |                |                 |                |
|--------------------|--------------------|-----------------|----------------|-----------------|----------------|-----------------|----------------|
|                    | <i>dataminutes</i> | <i>SOs</i>      |                | <i>spindles</i> |                | <i>ripples</i>  |                |
|                    |                    | <i>n events</i> | <i>density</i> | <i>n events</i> | <i>density</i> | <i>n events</i> | <i>density</i> |
| <i>p01</i>         | 122                | 421             | 3.4            | 674             | 5.5            | 75              | 0.6            |
| <i>p02</i>         | 104                | 319             | 3.1            | 378             | 3.6            | 280             | 2.7            |
| <i>p03</i>         | 215                | 1015            | 4.7            | 1487            | 6.9            | 194             | 0.9            |
| <i>p04</i>         | 169                | 530             | 3.1            | 572             | 3.4            | 207             | 1.2            |
| <i>p05</i>         | 162                | 450             | 2.8            | 523             | 3.2            | 107             | 0.7            |
| <i>p06</i>         | 120                | 382             | 3.2            | 517             | 4.3            | 83              | 0.7            |
| <i>p07</i>         | 187                | 743             | 4.0            | 1340            | 7.2            | 162             | 0.9            |
| <i>p08</i>         | 160                | 886             | 5.6            | 1725            | 10.8           | 348             | 2.2            |
| <i>p09</i>         | 147                | 479             | 3.3            | 683             | 4.6            | 112             | 0.8            |
| <i>p10</i>         | 145                | 579             | 4.0            | 953             | 6.6            | 83              | 0.6            |
| <i>p11</i>         | 50                 | 186             | 3.7            | 184             | 3.7            | 104             | 2.1            |
| <i>p12</i>         | 157                | 544             | 3.5            | 816             | 5.2            | 233             | 1.5            |
| <b>mean</b>        | <b>145</b>         | <b>545</b>      | <b>3.7</b>     | <b>821</b>      | <b>5.4</b>     | <b>166</b>      | <b>1.2</b>     |
| <b>s.d.</b>        | <b>42</b>          | <b>236</b>      | <b>0.8</b>     | <b>470</b>      | <b>2.2</b>     | <b>88</b>       | <b>0.7</b>     |

**Table S2b:** Length of artifact free NREM data segments ('dataminutes'), total number of events and event densities (n events/dataminutes) for SOs and spindles detected at Cz.

| <i>participant</i> | <b>Cz</b>          |                 |                |                 |                |
|--------------------|--------------------|-----------------|----------------|-----------------|----------------|
|                    | <i>dataminutes</i> | <i>SOs</i>      |                | <i>spindles</i> |                |
|                    |                    | <i>n events</i> | <i>density</i> | <i>n events</i> | <i>density</i> |
| <i>p01</i>         | 180                | 1045            | 5.8            | 1494            | 8.3            |
| <i>p02</i>         | 169                | 748             | 4.4            | 1215            | 7.2            |
| <i>p03</i>         | 277                | 1504            | 5.4            | 2407            | 8.7            |
| <i>p04</i>         | 231                | 1096            | 4.7            | 1466            | 6.3            |
| <i>p05</i>         | 244                | 748             | 3.1            | 2299            | 9.4            |
| <i>p06</i>         | 179                | 1045            | 5.9            | 1074            | 6.0            |
| <i>p07</i>         | 257                | 1422            | 5.5            | 1506            | 5.9            |
| <i>p08</i>         | 165                | 784             | 4.7            | 1391            | 8.4            |
| <i>p09</i>         | 227                | 1123            | 4.9            | 1903            | 8.4            |
| <i>p10</i>         | 148                | 673             | 4.6            | 1182            | 8.0            |
| <i>p11</i>         | 86                 | 676             | 7.8            | 513             | 5.9            |
| <i>p12</i>         | 189                | 782             | 4.2            | 1313            | 7.0            |
| <b>mean</b>        | <b>196</b>         | <b>971</b>      | <b>5.1</b>     | <b>1480</b>     | <b>7.5</b>     |
| <b>s.d.</b>        | <b>53</b>          | <b>283</b>      | <b>1.2</b>     | <b>523</b>      | <b>1.2</b>     |

**Table S3a.** EEG SO metrics and results for SO-spindle coupling using various event detection criteria. EEG metrics include the number of detected events (avg n) as well as the across-participant average of the peak, trough and peak-to-peak amplitude after bandpass filtering the EEG in the SO frequency ranges. PAC results include (i) the change in spindle power (12–16 Hz, relative to the –2.5 s to –1.5 s pre-event baseline) during the SO up-state (.25 s to .75 s relative to maximal down-state) along with results of a two-tailed t-test against 0, (ii) P values of a V-test against the hypothesized mean direction of 180° (i.e., modulation by the SO up-state) and (iii) number of significant participant-specific Rayleigh tests against the  $H_0$  of uniform distribution of preferred phase angles across all detected events (in the overall group of 12 participants). Percentiles denote the p2p amplitude cut-off, such that only the top 25% SOs were included for the 75<sup>th</sup> percentile criterion. *Mean + 2SD* denotes the SOs whose p2p amplitude  $\geq$  mean + 2 standard deviations of all SO candidates. *Multi-event SOs* denotes SOs that were preceded and/or followed by another SO down-state within  $\pm 1.3$  s ( $\sim 75$  Hz). *75th perc., cons.art.det.* denotes SOs whose p2p amplitude  $\geq$  75th percentile (i.e., the top 25%), as used in the main text, but after raising the thresholds for automated artifact detection (resulting in fewer rejected data segments).

| Hippocampus                                                  | avg<br>n | SO EEG          |                   |                | PAC                                    |      |      |                             |                                                |
|--------------------------------------------------------------|----------|-----------------|-------------------|----------------|----------------------------------------|------|------|-----------------------------|------------------------------------------------|
|                                                              |          | $\mu$ V<br>peak | $\mu$ V<br>trough | $\mu$ V<br>p2p | spindle power<br>(.25-.75 s, 12-16 Hz) |      |      | V-test<br>(180°)<br>P value | individually<br>significant<br>(Rayleigh test) |
|                                                              |          |                 |                   |                | % change                               | t    | p    |                             |                                                |
| 75 <sup>th</sup> percentile                                  | 545      | 134.5           | -130.4            | 264.9          | 45.6                                   | 3.90 | .003 | .001                        | 9                                              |
| 75 <sup>th</sup> percentile (both half-waves $\geq$ 400 ms)  | 527      | 130.2           | -128.0            | 258.2          | 44.0                                   | 3.75 | .003 | .001                        | 9                                              |
| 75 <sup>th</sup> percentile (for both half-waves separately) | 258      | 150.9           | -151.1            | 302.1          | 51.5                                   | 3.60 | .004 | .005                        | 9                                              |
| 75 <sup>th</sup> - 95 <sup>th</sup> percentile               | 482      | 115.9           | -109.4            | 225.3          | 39.3                                   | 3.80 | .003 | .001                        | 11                                             |
| 80 <sup>th</sup> percentile                                  | 482      | 137.6           | -134.1            | 271.7          | 48.5                                   | 4.07 | .002 | .001                        | 9                                              |
| 85 <sup>th</sup> percentile                                  | 362      | 148.7           | -144.5            | 293.2          | 52.3                                   | 3.86 | .003 | .000                        | 9                                              |
| 90 <sup>th</sup> percentile                                  | 241      | 161.5           | -161.3            | 322.8          | 56.8                                   | 3.62 | .004 | .003                        | 9                                              |
| mean + 2SD                                                   | 93       | 194.8           | -202.9            | 397.7          | 57.7                                   | 3.80 | .003 | .047                        | 7                                              |
| multi-event SOs                                              | 133      | 136.7           | -135.8            | 272.5          | 21.7                                   | 3.03 | .015 | .041                        | 8                                              |
| 75 <sup>th</sup> perc., cons.art.det.                        | 781      | 146.7           | -140.4            | 287.0          | 49.5                                   | 4.40 | .001 | .001                        | 10                                             |

| Cz                                                           | avg<br>n | SO EEG          |                   |                | PAC                                    |      |      |                           |                                                |
|--------------------------------------------------------------|----------|-----------------|-------------------|----------------|----------------------------------------|------|------|---------------------------|------------------------------------------------|
|                                                              |          | $\mu$ V<br>peak | $\mu$ V<br>trough | $\mu$ V<br>p2p | spindle power<br>(.25-.75 s, 12-16 Hz) |      |      | V-test<br>(0°)<br>P value | individually<br>significant<br>(Rayleigh test) |
|                                                              |          |                 |                   |                | % change                               | t    | p    |                           |                                                |
| 75 <sup>th</sup> percentile                                  | 971      | 31.1            | -31.2             | 62.2           | 27.3                                   | 5.73 | .000 | .004                      | 10                                             |
| 75 <sup>th</sup> percentile (both half-waves $\geq$ 400 ms)  | 872      | 31.3            | -31.5             | 62.8           | 28.2                                   | 5.82 | .000 | .004                      | 10                                             |
| 75 <sup>th</sup> percentile (for both half-waves separately) | 487      | 36.8            | -36.9             | 73.7           | 35.8                                   | 4.83 | .001 | .003                      | 11                                             |
| 75 <sup>th</sup> - 95 <sup>th</sup> percentile               | 804      | 26.4            | -26.4             | 52.8           | 23.5                                   | 5.97 | .000 | .020                      | 8                                              |
| 80 <sup>th</sup> percentile                                  | 803      | 33.1            | -33.3             | 66.4           | 29.1                                   | 5.54 | .000 | .004                      | 12                                             |
| 85 <sup>th</sup> percentile                                  | 602      | 36.2            | -36.6             | 72.8           | 34.3                                   | 6.33 | .000 | .001                      | 11                                             |
| 90 <sup>th</sup> percentile                                  | 402      | 40.5            | -41.1             | 81.7           | 40.0                                   | 5.15 | .000 | .002                      | 10                                             |
| mean + 2SD                                                   | 202      | 47.5            | -48.2             | 95.8           | 45.9                                   | 4.70 | .001 | .009                      | 9                                              |
| multi-event SOs                                              | 317      | 32.3            | -32.8             | 65.1           | 21.5                                   | 4.99 | .000 | .001                      | 10                                             |
| 75 <sup>th</sup> perc., cons.art.det.                        | 1226     | 33.5            | -33.8             | 67.3           | 28.9                                   | 5.41 | .000 | .008                      | 12                                             |

**Table S3b.** EEG spindle metrics and results for spindle-ripple coupling using various event detection criteria. EEG metrics include the number of detected events (avg n) as well as the across-participant average of the peak, trough and peak-to-peak amplitude after bandpass filtering the EEG in the spindle range. PAC results include (i) the change in ripple power (80–100 Hz, relative to the –2.5 s to –1.5 s pre-event baseline) from –.25 s to +.25 s relative to the maximal spindle trough (HC) or peak (Cz) along with results of a two-tailed t-test against 0, (ii) P values of a V-test against the hypothesized mean direction of 180° (HC, i.e., modulation by the spindle trough) or 0° (Cz, i.e., modulation by the spindle peak) and (iii) number of significant participant-specific Rayleigh tests against the  $H_0$  of uniform distribution of preferred phase angles across all detected events (in the overall group of 12 participants). Percentiles denote the RMS amplitude cut-off, such that only the top 25% spindles were included for the 75<sup>th</sup> percentile criterion. *Mean + 2SD* denotes the spindles whose RMS amplitude  $\geq$  mean + 2 standard deviations of all spindle candidates. *75th perc., cons.art.det.* denotes spindles whose RMS amplitude  $\geq$  75th percentile (i.e., the top 25%), as used in the main text, but after raising the thresholds for automated artifact detection (resulting in fewer rejected data segments).

| Hippocampus                           | avg n | spindle EEG  |                |             | PAC                                    |      |      |                       |                                          |
|---------------------------------------|-------|--------------|----------------|-------------|----------------------------------------|------|------|-----------------------|------------------------------------------|
|                                       |       | $\mu$ V peak | $\mu$ V trough | $\mu$ V p2p | ripple power ( $\pm$ .25 s, 80–100 Hz) |      |      | V-test (180°) P value | individually significant (Rayleigh test) |
|                                       |       |              |                |             | % change                               | t    | p    |                       |                                          |
| 75 <sup>th</sup> percentile           | 821   | 59.8         | -59.8          | 119.6       | 17.9                                   | 4.59 | .001 | .010                  | 11                                       |
| 80 <sup>th</sup> percentile           | 664   | 63.6         | -63.6          | 127.1       | 17.9                                   | 5.89 | .000 | .010                  | 12                                       |
| 85 <sup>th</sup> percentile           | 496   | 68.2         | -68.2          | 136.5       | 19.9                                   | 6.76 | .000 | .007                  | 11                                       |
| 90 <sup>th</sup> percentile           | 317   | 74.5         | -74.5          | 149.1       | 20.3                                   | 6.89 | .000 | .006                  | 11                                       |
| mean + 2SD                            | 150   | 83.9         | -84.0          | 167.8       | 21.0                                   | 3.63 | .004 | .002                  | 10                                       |
| 75 <sup>th</sup> perc., cons.art.det. | 1170  | 63.6         | -63.5          | 127.1       | 19.8                                   | 4.41 | .001 | .011                  | 12                                       |

| Cz                                    | avg n | spindle EEG  |                |             | PAC                                    |      |      |                     |                                          |
|---------------------------------------|-------|--------------|----------------|-------------|----------------------------------------|------|------|---------------------|------------------------------------------|
|                                       |       | $\mu$ V peak | $\mu$ V trough | $\mu$ V p2p | ripple power ( $\pm$ .25 s, 80–100 Hz) |      |      | V-test (0°) P value | individually significant (Rayleigh test) |
|                                       |       |              |                |             | % change                               | t    | p    |                     |                                          |
| 75 <sup>th</sup> percentile           | 1480  | 12.5         | -12.5          | 25.0        | 0.3                                    | 0.59 | .567 | .829                | 2                                        |
| 80 <sup>th</sup> percentile           | 1182  | 13.2         | -13.2          | 26.4        | -0.4                                   | 0.58 | .573 | .724                | 3                                        |
| 85 <sup>th</sup> percentile           | 877   | 14.1         | -14.1          | 28.2        | 0.0                                    | 0.03 | .975 | .906                | 1                                        |
| 90 <sup>th</sup> percentile           | 558   | 15.3         | -15.3          | 30.7        | -0.3                                   | 0.26 | .802 | .826                | 0                                        |
| mean + 2SD                            | 257   | 17.2         | -17.2          | 34.5        | 1.1                                    | 0.93 | .371 | .893                | 0                                        |
| 75 <sup>th</sup> perc., cons.art.det. | 1805  | 12.7         | -12.7          | 25.4        | 1.0                                    | 1.98 | .074 | .650                | 2                                        |

**Table S3c.** Results for spindle-ripple coupling *in ripple-locked TFR* using various event detection criteria. PAC results include the change in spindle power (12–16 Hz, relative to the –1.5 s to –1.0 s pre-event baseline) from –.25 s to +.25 s relative to the ripple peak along with results of a two-tailed t-test against 0. Percentiles denote the RMS amplitude cut-off, such that only the top 1% ripples were included for the 99<sup>th</sup> percentile criterion. *Mean + 3SD* denotes the ripples whose RMS amplitude  $\geq$  mean + 3 standard deviations of all ripple candidates. *99th perc., cons.art.det.* denotes ripples whose RMS amplitude  $\geq$  99th percentile (i.e., the top 1%), as used in the main text, but after raising the thresholds for automated artifact detection (resulting in fewer rejected data segments).

| Hippocampus                           | avg<br>n | PAC                                       |      |      |
|---------------------------------------|----------|-------------------------------------------|------|------|
|                                       |          | spindle power<br>( $\pm$ .25 s, 12–16 Hz) |      |      |
|                                       |          | %<br>change                               | t    | p    |
| 99 <sup>th</sup> percentile           | 166      | 65.5                                      | 4.49 | .001 |
| 98 <sup>th</sup> percentile           | 354      | 43.0                                      | 4.45 | .001 |
| mean + 3SD                            | 203      | 60.0                                      | 4.37 | .001 |
| 99 <sup>th</sup> perc., cons.art.det. | 238      | 67.5                                      | 4.53 | .001 |

**Table S4.** Participant’s drug regimen at the time of recordings

| participant | Anticonvulsant              | Antidepressant |
|-------------|-----------------------------|----------------|
| p01         | Clobazam, Valproat          | -              |
| p02         | Clobazam, Valproat          | -              |
| p03         | Lamotrigin, Levetiracetam   | -              |
| p04         | Lacosamide, Levetiracetam   | -              |
| p05         | Lamotrigin, Levetiracetam   | -              |
| p06         | Lamotrigin, Oxcarbazepin    | -              |
| p07         | Lamotrigin, Oxcarbazepin    | Citalopram     |
| p08         | Lamotrigin                  | -              |
| p09         | Levetiracetam               | -              |
| p10         | Lamotrigin                  | Sertralin      |
| p11         | Levetiracetam, Oxcarbazepin | -              |
| p12         | Oxcarbazepin                | -              |

**Table S5.** Documented effects of anticonvulsant and antidepressant drugs on sleep architecture/oscillations. ↑ ... increase ↓ ... decrease. N1-3 ... sleep stages according to Iber, C., Ancoli-Israel, S., Chesson, A. & Quan, S.F. The AASM manual for the scoring of sleep and associated events: rules, terminology and technical specifications. (2007). 1 ... D. Neckelmann, B. Bjorvatn, A. Bjørkum, R. Ursin, Behavioural brain research 79, 183 (1996). 2 ... A. L. van Bommel, R. H. van den Hoofdakker, D. G. Beersma, A. L. Bouhuys, Psychopharmacology 113, 225 (1993). 3 ... S. Wilson et al., European neuropsychopharmacology 14, 367 (2004). 4 ... S. V. Jain, T. A. Glauser, Epilepsia 55, 26 (2014). 5 ... J. D. Hudson et al., Seizure 25, 155 (2014). 6 ... R. D. Jindal et al., Journal of clinical psychopharmacology 23, 540 (2003).

| <b>Drug</b>   | <b>Effects on sleep structure</b>                       |
|---------------|---------------------------------------------------------|
| Citalopram    | REM ↓; REM alpha power ↓ ( <sup>1-3</sup> )             |
| Clobazam      | N2↑, N1↓, SWS↓ ( <sup>4</sup> )                         |
| Lacosamide    | none ( <sup>5</sup> )                                   |
| Lamotrigin    | REM↑, N2↑, SWS↓ ( <sup>4</sup> )                        |
| Levetiracetam | N2↑, REM↓ ( <sup>4</sup> )                              |
| Oxcarbazepin  | unknown                                                 |
| Sertralin     | delta power ↑ during first sleep cycle ( <sup>6</sup> ) |
| Valproat      | N1↑, REM↑ ( <sup>4</sup> )                              |
